# Supplementary material for: Phytoplankton Toxins and Their Potential Therapeutic Applications: A Journey toward the Quest for Potent Pharmaceuticals
Source: MDPI journal article supplement (doi:10.3390/md20040271), 2022-04-18
Supplement: s1 [file s1]

**Supplementary Table S1:** Toxins from dinoflagellate and their different potential therapeutic applications

| Sl. No. | Toxin name         | Source                                                                                                                                                       | Therapeutic action                                                                                                                                                                                                              | References |
|---------|--------------------|--------------------------------------------------------------------------------------------------------------------------------------------------------------|---------------------------------------------------------------------------------------------------------------------------------------------------------------------------------------------------------------------------------|------------|
| 1       | Saxitoxin (STXs)   | <i>Alexandrium minutum</i> , <i>Alexandrium tamarense</i> , <i>Alexandrium catenella</i> , <i>Gymnodinium. catenatum</i> , and <i>Pyrodinium bahamense</i> , | Displayed <i>in vitro</i> antifungal, antibacterial, antialgal and antiprotozoal activity                                                                                                                                       | [88]       |
| 2       | Gonyautoxins (GTX) | <i>Amphydinium</i>                                                                                                                                           | Used as a pain reliever                                                                                                                                                                                                         | [73]       |
|         | GTX2 and GTX3      | <i>Amphydinium</i>                                                                                                                                           | Chronic tension-type headaches                                                                                                                                                                                                  | [74]       |
| 3       | Tetrodotoxin (TTX) | <i>Alexandrium tamarense</i>                                                                                                                                 | Reduce narcotic cravings in laboratory animals and is being employed in drug addiction. Treatment of heroin addiction withdrawal                                                                                                | [122]      |
| 4       | Okadaic acid (OA)  | <i>Porocentrum lima</i> , <i>Porocentrum cuncavum</i> , <i>Porocentrum belezeanum</i> , <i>Porocentrum mascul</i>                                            | Cytotoxic effects in numerous cell types, including intestinal cells, blood cells, brain cells, lung cells, and hepatic cells,                                                                                                  | [43]       |
| 4       | Okadaic acid (OA)  | <i>Porocentrum lima</i> , <i>Porocentrum cuncavum</i> , <i>Porocentrum</i>                                                                                   | Act as anti-tumor agents on breast cancer cells as it inhibits protein phosphatase 2A                                                                                                                                           | [42]       |
| 5       | Okadaic acid (OA)  | <i>Porocentrum lima</i> , <i>Porocentrum cuncavum</i> , <i>Porocentrum</i>                                                                                   | Act as typical antipsychotic medications in the treatment of cognitive impairment and neuropathological alterations in schizophrenia and other neurodegenerative illnesses because of its tumor-promoting and cytotoxic actions | [75]       |
| 6       | Okadaic acid (OA)  | <i>Porocentrum lima</i> , <i>Porocentrum cuncavum</i> , <i>Porocentrum</i>                                                                                   | Alzheimer's disease and other neurodegenerative illnesses linked to memory loss                                                                                                                                                 | [68]       |
| 7       | Okadaic acid (OA)  | <i>Porocentrum lima</i> , <i>Porocentrum cuncavum</i> , <i>Porocentrum</i>                                                                                   | Diabetes, AIDS, and cancer to reveal numerous pathways related to these diseases                                                                                                                                                | [76]       |
| 8       | Okadaic acid (OA)  | <i>Porocentrum lima</i> , <i>Porocentrum cuncavum</i> , <i>Porocentrum</i>                                                                                   | Immunoregulatory potential, since it causes T-cell receptor expression to be                                                                                                                                                    | [128]      |

|    |                                |      |                                                                                                   |                                                                                                                                                       |       |
|----|--------------------------------|------|---------------------------------------------------------------------------------------------------|-------------------------------------------------------------------------------------------------------------------------------------------------------|-------|
|    |                                |      |                                                                                                   | downregulated, affecting T-cell responsiveness and, as a result, immunological response                                                               |       |
| 9  | Okadaic acid (OA)              | acid | <i>Porocentrum lima</i> , <i>Porocentrum cuncavum</i> , <i>Porocentrum</i>                        | Triggers an inflammatory response in HL-60 human cells by significantly increasing interleukin 8 (IL-8) levels                                        | [44]  |
| 10 | Okadaic acid (OA)              | acid | <i>Porocentrum lima</i> , <i>Porocentrum cuncavum</i> , <i>Porocentrum</i>                        | Increase the activity of hypoxia-inducible factor-1 (HIF-1) a protein closely linked to vascular endothelial growth factor in human endothelial cells | [45]  |
| 11 | Okadaic acid (OA)              | acid | <i>Porocentrum lima</i> , <i>Porocentrum cuncavum</i> , <i>Porocentrum</i>                        | Fungicidal properties, specifically the capacity to suppress <i>Candida albicans</i> growth                                                           | [79]  |
| 12 | Amphidinolides and colopsinols |      | <i>Amphidinium</i>                                                                                | Exhibit powerful anticancer effects via inhibition of cancer cell lines                                                                               | [129] |
| 13 | Amphidinolides and colopsinols |      | <i>Amphidinium</i>                                                                                | Showed high cytotoxicity against murine lymphoma L1210 and human epidermoid carcinoma KB cells                                                        | [46]  |
| 14 | Caribenolide I                 |      | <i>Amphidinium</i>                                                                                | Showed high cytotoxicity in human colon tumor cell line HCT 116 and its drug-resistant variation HCT 116/VM 46                                        | [47]  |
| 15 | Caribenolide I                 |      | <i>Amphidinium</i>                                                                                | Showed efficacious <i>in vivo</i> against the mouse tumor P388                                                                                        | [48]  |
| 16 | Gonyautoxins                   |      | <i>Amphidinium</i>                                                                                | It has been employed in clinical practice for anal sphincter infiltrations                                                                            | [73]  |
| 17 | Goniodomin-A                   |      | <i>Goniodoma pseudogoniaulax</i>                                                                  | Prevent angiogenesis by decreasing endothelial cell migration and tube formation caused by basic fibroblast growth factor (bFGF)                      | [124] |
| 18 | Gymnocin-A                     |      | <i>Gymnodinium mikimotoi</i>                                                                      | Displayed cytotoxic to P388 murine leukemia cells                                                                                                     | [49]  |
| 19 | Yessotoxins (YTXs)             |      | <i>Protoceratium reticulatum</i> , <i>Lingulodinium polyedra</i> , and <i>Gonyaulax spinifera</i> | Impair the E-cadherin–catenin system selectively in epithelial cells, thus jeopardizing Ecadherin's tumor-suppressive effects                         | [50]  |

|    |                                  |                                                                                                    |                                                                                                                                                                               |           |
|----|----------------------------------|----------------------------------------------------------------------------------------------------|-------------------------------------------------------------------------------------------------------------------------------------------------------------------------------|-----------|
| 20 | Yessotoxins (YTXs)               | <i>Protoceratium cf. reticulatum</i>                                                               | Displayed significant cytotoxic effects                                                                                                                                       | [120]     |
| 21 | Protoceratins I, II, III, and IV | <i>Protoceratium cf. reticulatum</i>                                                               | Displayed cytotoxicity selectively against human cancer cell lines with mean IC <sub>50</sub> values of less than 0.0005 M                                                    | [53]      |
| 22 | YTX and its analogues            | <i>Protoceratium reticulatum</i> , <i>Lin-gulodinium polyedra</i> , and <i>Gonyaulax spinifera</i> | Displayed multiple biological apoptotic pathways                                                                                                                              | [131]     |
| 23 | YTX and its analogues            | <i>Protoceratium reticulatum</i> , <i>Lin-gulodinium polyedra</i> , and <i>Gonyaulax spinifera</i> | In BC3H1 myoblast cells, primary cortical neurons, and glioma cells, it also causes non-apoptotic cell death                                                                  | [51]      |
| 24 | YTX and its analogues            | <i>Protoceratium reticulatum</i> , <i>Lin-gulodinium polyedra</i> , and <i>Gonyaulax spinifera</i> | Modulates caspase protein activation via permeability transition through mitochondria and alteration of cytoskeleton (viz. selective disruption of F-actin microfilaments)    | [133,134] |
| 25 | YTX and its analogues            | <i>Protoceratium reticulatum</i> , <i>Lin-gulodinium polyedra</i> , and <i>Gonyaulax spinifera</i> | Inhibits the growth of melanoma tumor cells in mice cells <i>in vivo</i> , with minimal damage                                                                                | [52]      |
| 26 | YTX and its analogues            | <i>Protoceratium reticulatum</i> , <i>Lin-gulodinium polyedra</i> , and <i>Gonyaulax spinifera</i> | Impair immunological function by reducing phagocytic activity in the J774 cell line and increasing cytokine expression in J774 phagocyte mammalian cells                      | [133]     |
| 27 | YTX and its analogues            | <i>Protoceratium reticulatum</i> , <i>Lin-gulodinium polyedra</i> , and <i>Gonyaulax spinifera</i> | Control the immunological impact on T-lymphocyte EL-4 cells via reversible T-cell receptor complex down-regulation                                                            | [128]     |
| 28 | YTX and its analogues            | <i>Protoceratium reticulatum</i> , <i>Lin-gulodinium polyedra</i> , and <i>Gonyaulax spinifera</i> | Used to treat Alzheimer's disease by lowering the levels of t- and $\beta$ -amyloid, two insoluble formations found in the brain that are responsible for the illness's onset | [69]      |
| 29 | YTX and its analogues            | <i>Protoceratium reticulatum</i> , <i>Lin-gulodinium polyedra</i> , and <i>Gonyaulax spinifera</i> | Treatment/prevention of lipid and glucose metabolism-related disorders in glioma cells, as well as pancreatic and liver transcriptional abnormalities                         | [135]     |

|    |                       |                                                                                                                                                 |                                                                                                                                                                                                                                                      |              |
|----|-----------------------|-------------------------------------------------------------------------------------------------------------------------------------------------|------------------------------------------------------------------------------------------------------------------------------------------------------------------------------------------------------------------------------------------------------|--------------|
| 30 | YTX and its analogues | <i>Protoceratium reticulatum</i> , <i>Leptodinium polyedra</i> , and <i>Gonyaulax spinifera</i>                                                 | Minor role as anti-allergenic and -asthmatic drug                                                                                                                                                                                                    | [83]         |
| 31 | Pectenotoxin (PTX)    | <i>D. fortii</i> , <i>D. acuta</i> , <i>D. tripus</i> , <i>D. acuminata</i> , <i>D. caudate</i> , <i>D. rotundata</i> , and <i>D. norvegica</i> | Strong cytotoxic against various human cancer cell lines such as lung, colon, and breast cancer cells                                                                                                                                                | [54]         |
| 32 | Pectenotoxin (PTX)    | <i>D. fortii</i> , <i>D. acuta</i> , <i>D. tripus</i> , <i>D. acuminata</i> , <i>D. caudate</i> , <i>D. rotundata</i> , and <i>D. norvegica</i> | Act as potential chemotherapeutic treatment for p53-deficient malignancies                                                                                                                                                                           | [138]        |
| 33 | Ciguatoxin (CTX)      | <i>Gambierdiscus toxicus</i>                                                                                                                    | Increased muscular contraction, particularly in cardiac tissue, and excessive fluid secretion by gastrointestinal cells                                                                                                                              | [55,56]      |
| 34 | Maitotoxin (MTX)      | <i>Gambierdiscus toxicus</i> , <i>G. australes</i> , and <i>Gambierdiscus pacificus</i>                                                         | Displayed innate immune responses and inflammation                                                                                                                                                                                                   | [144,150]    |
| 35 | Maitotoxin (MTX)      | <i>Gambierdiscus toxicus</i> , <i>G. australes</i> , and <i>Gambierdiscus pacificus</i>                                                         | Promotes the synthesis and secretion of nerve growth factor by activating voltage-insensitive Ca <sup>2+</sup> channels in C6-BU-1 glioma cells                                                                                                      | [151]        |
| 36 | Brevetoxin (BTX)      | <i>Karenia brevis</i> (formerly known as <i>Gymnodinium breve</i> or <i>Ptychodiscus brevis</i> )                                               | Reduces respiratory irritation symptoms such as cough, irritability of the nose, congestion, bronchoconstriction, and/or asthma attacks in people                                                                                                    | [156]        |
| 37 | Brevetoxin (BTX)      | <i>Karenia brevis</i> (formerly known as <i>Gymnodinium breve</i> or <i>Ptychodiscus brevis</i> )                                               | Alters immunological response in alveolar macrophage cells by increasing cytokines (such as TNF- and IL-2) involved in immune cell activation, which reduces phagocytosis activity and plays a key role in allergic inflammation in pulmonary tissue | [57,157,158] |
| 38 | Brevetoxin (BTX)      | <i>Karenia brevis</i> (formerly known as <i>Gymnodinium breve</i> or <i>Ptychodiscus brevis</i> )                                               | Displayed a dose-dependent effect on cell growth, causes cell death via an apoptotic mechanism, and has genotoxic properties                                                                                                                         | [57,58]      |
| 39 | BTX-2                 | <i>Karenia brevis</i> (formerly known as <i>Gymnodinium breve</i> or <i>Ptychodiscus brevis</i> )                                               | It can improve neuronal plasticity and treatments for restoring brain function                                                                                                                                                                       | [84]         |

|    |                                       |                                                                                                                                                          |                                                                                                                                                                        |           |
|----|---------------------------------------|----------------------------------------------------------------------------------------------------------------------------------------------------------|------------------------------------------------------------------------------------------------------------------------------------------------------------------------|-----------|
|    |                                       |                                                                                                                                                          | following a stroke or other traumatic brain damage                                                                                                                     |           |
| 40 | Zooxanthella-toxins (ZTs) A, B, and C | <i>Symbiodinium</i> sp.                                                                                                                                  | Vasoconstrictive activity                                                                                                                                              | [161]     |
| 41 | Symbioimine                           | <i>Symbiodinium</i> sp.                                                                                                                                  | Displayed an antiresorptive medication that could be used to prevent and treat osteoporosis in postmenopausal women                                                    | [85]      |
| 42 | Symbioimine                           | <i>Symbiodinium</i> sp.                                                                                                                                  | May also be useful in the development of new nonsteroid anti-inflammatory medicines for the treatment of cyclooxygenase-2-related disorders                            | [86]      |
| 43 | Palytoxin (PLTX)                      | <i>Ostreopsis siamensis</i> , <i>Ostreopsis mascarenensis</i> , <i>Ostreopsis lenticularis</i> , <i>Ostreopsis ovata</i> , <i>Ostreopsis fattorussoi</i> | Remarkable biological activity including a wide spectrum of pharmacological effects                                                                                    | [162,163] |
| 44 | Ostreocin-D                           | <i>Ostreopsis siamensis</i> , <i>Ostreopsis mascarenensis</i> , <i>Ostreopsis lenticularis</i> , <i>Ostreopsis ovata</i> , <i>Ostreopsis fattorussoi</i> | Modulates neurotransmitters (norepinephrine and/or acetylcholine), and activates pro-inflammatory signaling cascades such as release of histamine and prostaglandin-E2 | [164]     |
| 45 | PLTX and Ostreocin-D                  | <i>Ostreopsis siamensis</i> , <i>Ostreopsis mascarenensis</i> , <i>Ostreopsis lenticularis</i> , <i>Ostreopsis ovata</i> , <i>Ostreopsis fattorussoi</i> | Modulates cytoskeleton distortion and dynamics in intestinal and neuroblastoma cells and also can significantly reduce cytotoxicity                                    | [60,61]   |
| 46 | PLTX                                  | <i>Palythoa clavata</i> polyps                                                                                                                           | Suitable for therapeutic use against lymphoblastic or myelogenous leukemia                                                                                             | [59]      |
| 47 | Gambierol                             | <i>Gambierdiscus toxicus</i>                                                                                                                             | Beneficial to patients of brain injury                                                                                                                                 | [87]      |
| 48 | Gambierol                             | <i>Gambierdiscus toxicus</i>                                                                                                                             | T-cell-mediated autoimmune disorders                                                                                                                                   | [77,78]   |
| 49 | Gambierol                             | <i>Gambierdiscus toxicus</i>                                                                                                                             | Used against multiple sclerosis, type 1 diabetes, and rheumatoid arthritis                                                                                             | [77,78]   |
| 50 | Gambierol                             | <i>Gambierdiscus toxicus</i>                                                                                                                             | Reducing $\beta$ -amyloid and/or tau hyperphosphorylation in Alzheimer's disease both <i>in vitro</i> and <i>in vivo</i>                                               | [70]      |

|    |                           |                                                                                          |                                                                                                                                                                                                                                                                |               |
|----|---------------------------|------------------------------------------------------------------------------------------|----------------------------------------------------------------------------------------------------------------------------------------------------------------------------------------------------------------------------------------------------------------|---------------|
| 51 | Azaspiracid (AZA)         | <i>Azadinium spinosum</i> , <i>Azadinium poporum</i> , and <i>Azadinium dexteroporum</i> | Cytotoxicity against a variety of human cell types, as well as the capacity to modify cell shape and cytoskeleton structure, particularly in the E-cadherin system                                                                                             | [136,175,176] |
| 52 | Azaspiracid (AZA)         | <i>Azadinium spinosum</i> , <i>Azadinium poporum</i> , and <i>Azadinium dexteroporum</i> | Effective modulator of intracellular cAMP and calcium levels, as well as a potent activator of c-Jun-N-terminal kinase (JNK) and caspases, both of which are involved in stress-signaling pathways such as cell damage, apoptosis, and cytoskeleton regulation | [177-179]     |
| 53 | Azaspiracid (AZA)         | <i>Azadinium spinosum</i> , <i>Azadinium poporum</i> , and <i>Azadinium dexteroporum</i> | Lowers cell cholesterol levels, especially in T-lymphocyte cells                                                                                                                                                                                               | [62,63]       |
| 54 | Gymnocin-A (GYMA)         | <i>Gymnodinium mikimotoi</i>                                                             | Extremely toxic to P388 murine leukemia cells.                                                                                                                                                                                                                 | [64]          |
| 55 | Karlotoxin (KmTx)         | <i>Karlodinium veneficum</i>                                                             | Displayed variety of actions, including haemolytic, cytotoxic, ichthyotoxic, and antifungal                                                                                                                                                                    | [65,80-82]    |
| 56 | Karlotoxin (KmTx)         | <i>Karlodinium veneficum</i>                                                             | Used to treat a variety of human diseases, including coronary heart disease (CHD)                                                                                                                                                                              | [65,66]       |
| 57 | Karlotoxin (KmTx)         | <i>Karlodinium veneficum</i>                                                             | Used as new chemotherapeutic drug to control cancer in various solid tumor lines, such as breast and prostate cancer cells, by inducing cell death through cholesterol depletion                                                                               | [65,66]       |
| 58 | Spirolide (SPX)           | <i>Alexandrium ostenfeldii</i> /peruvianum and <i>Karenia selliformes</i>                | Cytotoxic effects                                                                                                                                                                                                                                              | [186]         |
| 59 | Combination of GYM and OA |                                                                                          | Employed therapeutically to boost anti-cancer effects by inducing tumor cell toxicity and acting as chemotherapeutic drugs                                                                                                                                     | [67]          |
| 60 | GYM                       |                                                                                          | More sensitive to apoptotic stimuli. Neuro2a neuroblastoma cell line                                                                                                                                                                                           | [67]          |

---

|    |     |                                                                                                                         |      |
|----|-----|-------------------------------------------------------------------------------------------------------------------------|------|
| 61 | GYM | Lowering $\beta$ -amyloid levels and tau phosphorylation, which could help with the treatment of degenerative illnesses | [71] |
|----|-----|-------------------------------------------------------------------------------------------------------------------------|------|

---
